# Supplementary material for: The diagnostic role of complete MICM-P in metastatic carcinoma of bone marrow (MCBM) presented with atypical symptoms: A 7-year retrospective study of 45 cases in a single center
Source: PubMed Central journal article supplement (PMC9666179; doi:10.1097/md.0000000000031731), 2022-11-11

**Supplementary Figure 1.** Flowchart of the patient selection.

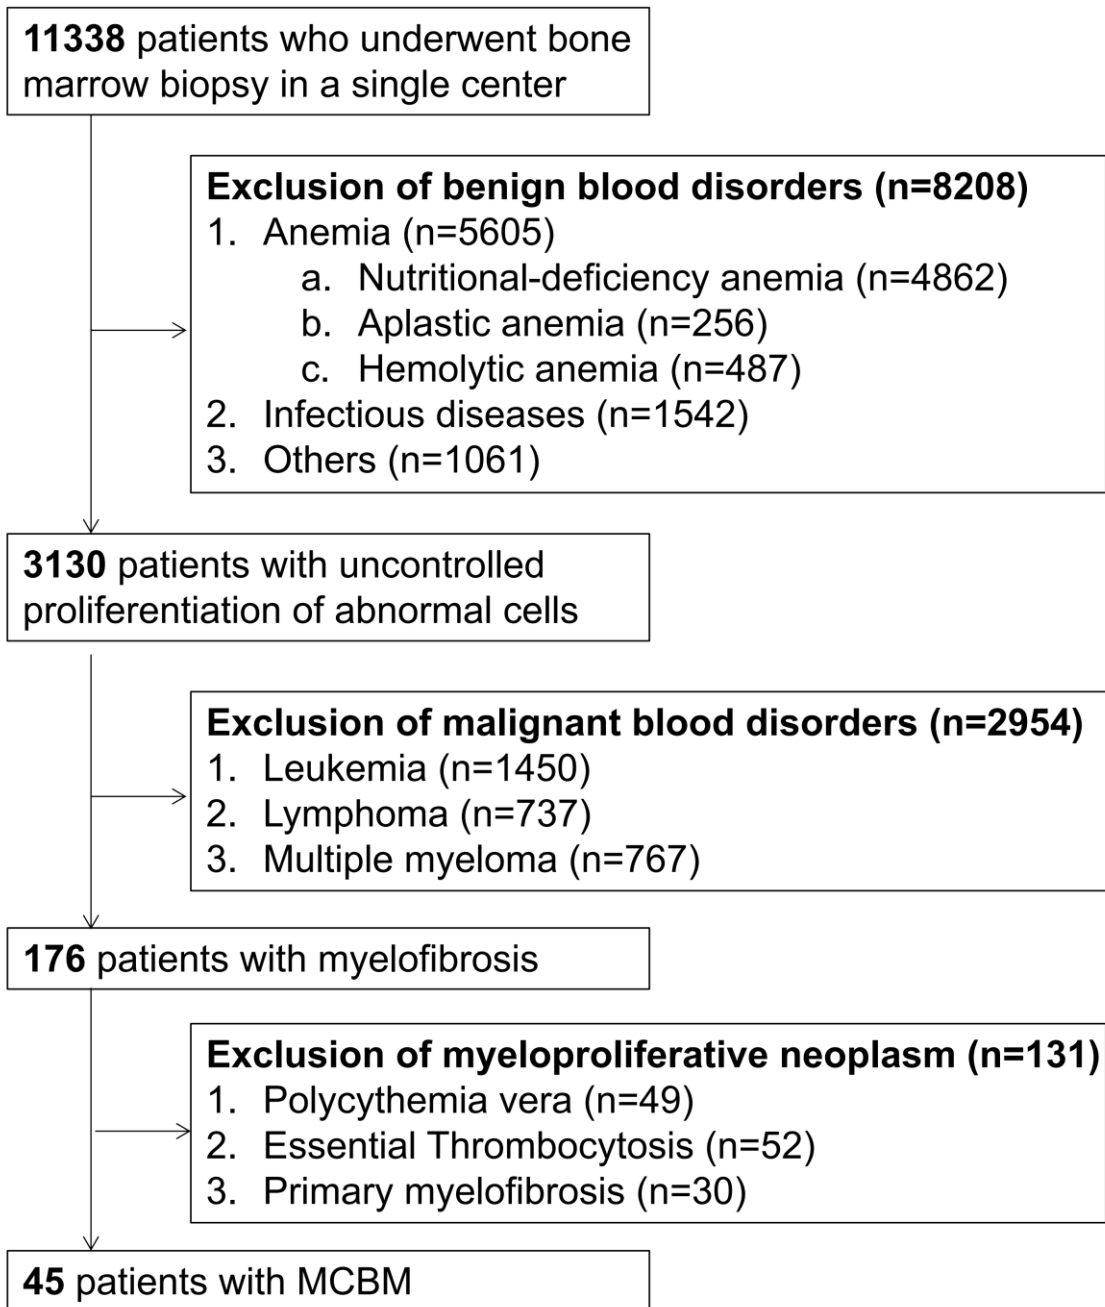

Supplement: medi-101-e31731-s001.pdf [file medi-101-e31731-s001.pdf]
