# Supplementary material for: The diagnostic role of complete MICM-P in metastatic carcinoma of bone marrow (MCBM) presented with atypical symptoms: A 7-year retrospective study of 45 cases in a single center
Source: PubMed Central journal article supplement (PMC9666179; doi:10.1097/md.0000000000031731), 2022-11-11
Supplement: medi-101-e31731-s002.pdf [file medi-101-e31731-s002.pdf]

**Supplementary Table 1. The result of bone marrow smear**

| <b>Item, n (%)</b>            | <b>Patients (n=45)</b> |
|-------------------------------|------------------------|
| <b>Degree of hyperplasia</b>  |                        |
| Severe hypoplasia             | 16 (35.5%)             |
| Hypoplasia                    | 11 (22.4%)             |
| Hyperplasia                   | 14 (31.1%)             |
| Marked hyperplasia            | 4 (8.9%)               |
| <b>Dry tap</b>                |                        |
| Yes                           | 18 (40.0%)             |
| No                            | 27 (60.0%)             |
| <b>Granulocyte percentage</b> |                        |
| <45%                          | 14 (31.1%)             |
| ≥45%                          | 31 (68.9%)             |
| <b>Erythrocyte percentage</b> |                        |
| <15%                          | 21 (46.7%)             |
| ≥15%                          | 24 (53.3%)             |
| <b>Megakaryocyte count</b>    |                        |
| <20                           | 28 (62.2%)             |
| ≥20                           | 17 (37.8%)             |
| <b>Tumor cells presenting</b> |                        |
| Yes                           | 22 (48.9%)             |
| Clustered                     | 19 (42.2%)             |
| Scattered                     | 3 (6.7%)               |
| No                            | 23 (51.1%)             |
